# Supplementary material
Source: PubMed Central journal article supplement (PMC7864109)
Supplement: Supp_TableS1.pdf [file Supp_TableS1.pdf]

## Supplementary Data

**Supplementary Table S1. Association of TeleED Exposure with Myocardial Infarction Process Outcomes (Excluding Cardiac Arrest)**

|                                                | <i>N</i>        | $\beta$ /OR | 95% CI         | P      | $\beta$ ( <sub>ADJ</sub> )*/AOR* | 95% CI         | P      |
|------------------------------------------------|-----------------|-------------|----------------|--------|----------------------------------|----------------|--------|
| Time to ECG** (logarithmic transform)          |                 |             |                |        |                                  |                |        |
| AMI and chest pain                             | 1,096           | -0.32       | -0.46 to -0.17 | <0.001 | -0.33                            | -0.48 to -0.17 | <0.001 |
| AMI-only                                       | 222             | -0.50       | -0.82 to -0.18 | 0.002  | -0.45                            | -0.82 to -0.08 | 0.019  |
| Fibrinolysis administered (yes/no)             | 72 <sup>a</sup> | 13.33       | 4.22 to 42.10  | <0.001 | 5.70 <sup>#</sup>                | 1.54 to 21.12  | 0.009  |
| Time to fibrinolysis** (logarithmic transform) | 36 <sup>b</sup> | -0.09       | -0.41 to 0.23  | 0.584  | -0.16                            | -0.49 to 0.16  | 0.329  |

<sup>a</sup>Among ST-elevation myocardial infarction subjects who were fibrinolysis eligible.

<sup>b</sup>Among ST-elevation myocardial infarction subjects who received fibrinolysis.

\*Adjusted for: age (categorical), sex, CPT code (categorical), and race.

<sup>#</sup>Adjusted for: age (categorical), sex, and CPT code (categorical).

\*\*Coefficients are relative time to ECG/fibrinolysis for teleED group compared with non-teleED group. For example, in the adjusted model for AMI and chest pain subjects, total time to ECG (in minutes) is, on average, 0.32 faster for teleED subjects compared with non-teleED subjects.

AOR, adjusted odds ratio; AMI, acute myocardial infarction; CI, confidence interval; CPT, current procedural terminology; ECG, electrocardiogram; OR, odds ratio.
